# Supplementary material for: Time to death and predictors of mortality among asphyxiated neonates in southwest Ethiopia, 2022: prospective cohort study
Source: HighWire-hosted journal article supplement (doi:10.1136/bmjopen-2023-077943), 2024-01-01
Supplement: bmjopen-2023-077943supp001_data_supplement.pdf [file bmjopen-2023-077943supp001_data_supplement.pdf]

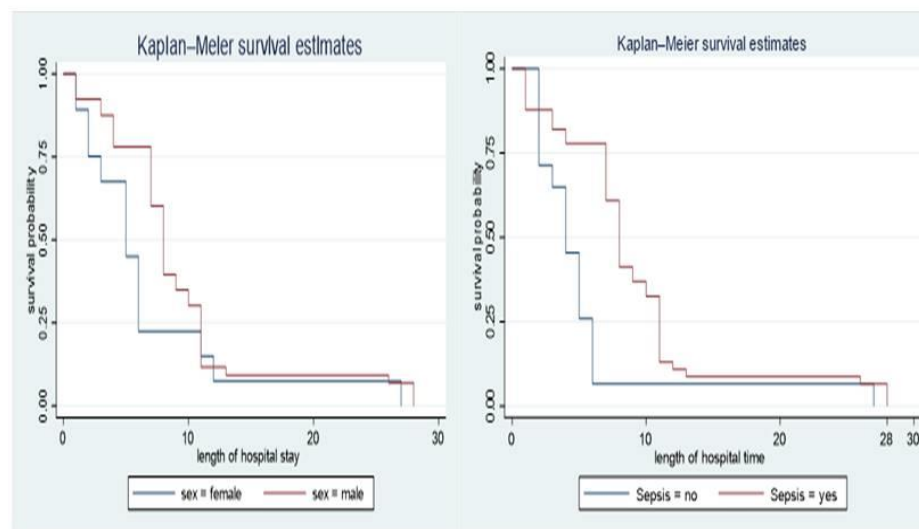

**Supplementary Figure 1:** Survival graph based on covariates of asphyxiated neonates admitted to the NICU, southwest, Ethiopia, (N=144).
