# Supplementary material for: Time to death and predictors of mortality among asphyxiated neonates in southwest Ethiopia, 2022: prospective cohort study
Source: HighWire-hosted journal article supplement (doi:10.1136/bmjopen-2023-077943), 2024-01-01
Supplement: bmjopen-2023-077943supp003_data_supplement.pdf [file bmjopen-2023-077943supp003_data_supplement.pdf]

**Supplementary Table 2:** Maternal obstetric and medical characteristics of mothers whose asphyxiated neonates were admitted to the NICU, Southwest, Ethiopia, (N=144).

| Characteristics                                             |                      | Category    | Frequencies | Percentages |
|-------------------------------------------------------------|----------------------|-------------|-------------|-------------|
| Antenatal care visit status                                 |                      | Yes         | 122         | 84.7        |
|                                                             |                      | No          | 22          | 15.3        |
| Mode of delivery                                            |                      | C/S         | 33          | 22.9        |
|                                                             |                      | Vaginal     | 111         | 77.1        |
| Type of pregnancy                                           |                      | Single      | 96          | 66.7        |
|                                                             |                      | Multiple    | 48          | 33.3        |
| Maternal parity                                             |                      | Para I      | 67          | 46.5        |
|                                                             |                      | Multi –Para | 77          | 53.5        |
| Pregnancy induced hypertension during the current pregnancy |                      | No          | 132         | 91.7        |
|                                                             |                      | Yes         | 12          | 8.3         |
| Chronic Medical disease of mothers                          | HIV                  | No          | 141         | 97.92       |
|                                                             |                      | Yes         | 3           | 2.08        |
|                                                             | DM                   | No          | 142         | 98.6        |
|                                                             |                      | Yes         | 2           | 1.4         |
|                                                             | Chronic hypertension | No          | 139         | 96.53       |
|                                                             |                      | Yes         | 5           | 3.47        |
